# Supplementary material for: Deterministic Assessment of the Risk of Phthalate Esters in Sediments of U-Tapao Canal, Southern Thailand
Source: PubMed Central journal article supplement (PMC7712367; doi:10.3390/toxics8040093), 2020-10-26
Supplement: toxics-08-00093-s001.pdf [file toxics-08-00093-s001.pdf]

# Deterministic Assessment of the Risk of Phthalate Esters in Sediments of U-Tapao Canal, Southern Thailand

Okpara Kingsley 1,2,\* Banchong Witthayawirasak 1,2

## Risk Quotient (RQ) Method

The Ecological risk assessments of PAEs was also carried out by using the risk quotient method (RQ) in accordance to the European Commission's Technical Guidance Document [21, 22]. RQ for detected PAEs congeners was estimated by dividing the measured environmental concentration (MEC) with the predicted no-effect concentration (PNEC) as indicated in equation 4. In this study, the mean and highest MEC values were used for calculating general  $RQ_{mean}$  and worst-case scenarios  $RQ_{max}$ , respectively. The risk quotient of the mixture ( $RQ_{mix}$ ) of PAEs was calculated based on the summation of individual RQ values of PAEs congeners detected in sediments as indicated in the text. The criteria used to assess the ecological risk assessment were  $RQ > 1$  (the log  $K_{ow}$  of PAE congener between 3 and 5) showed high risk whereas  $RQ > 10$  (log  $K_{ow} > 5$ ) suggested high risk [22, 29]. The US EPA ECOTOX database provided the chronic or acute toxicity data of PAEs to the algae, crustaceans, and fish for this study (<http://cfpub.epa.gov/ecotox/>). PNEC values in the sediment used in this study are indicated in Table below.

**Table S1.** Toxicity data of 3 PAEs to sensitive surrogate aquatic species.

| PAEs | Population | Species                         | Toxicity data                | AF   | PNEC <sub>water</sub> | PNEC <sub>sediment</sub> |
|------|------------|---------------------------------|------------------------------|------|-----------------------|--------------------------|
| DBP  | Algae      | Pseudokirchneriella subcapitata | 96 h, population, NOEC = 210 | 10   | 21                    | 2.33                     |
|      | crustacean | Americamysis bahia              | 21 d, mortality, NOEC = 260  | 10   | 26                    | 2.88                     |
|      | Fish       | Oncorhynchus mykiss             | 99 d, growth, NOEC = 100     | 10   | 10                    | 1.11                     |
| DEHP | Algae      | Pseudokirchneriella subcapitata | 96 h, population, EC50 = 100 | 1000 | 0.1                   | 3.25                     |
|      | Crustacean | Mytilus edulis                  | 21 d, mortality, NOEC = 42   | 50   | 0.84                  | 13.6                     |
|      | Fish       | Gasterosteus aculeatus          | 28 d, mortality, NOEC = 300  | 50   | 6                     | 32.5                     |
| DiNP |            | Daphnia magna                   | 21 d, mortality, NOEC = 34   | 100  | 0.34                  | 181.4                    |

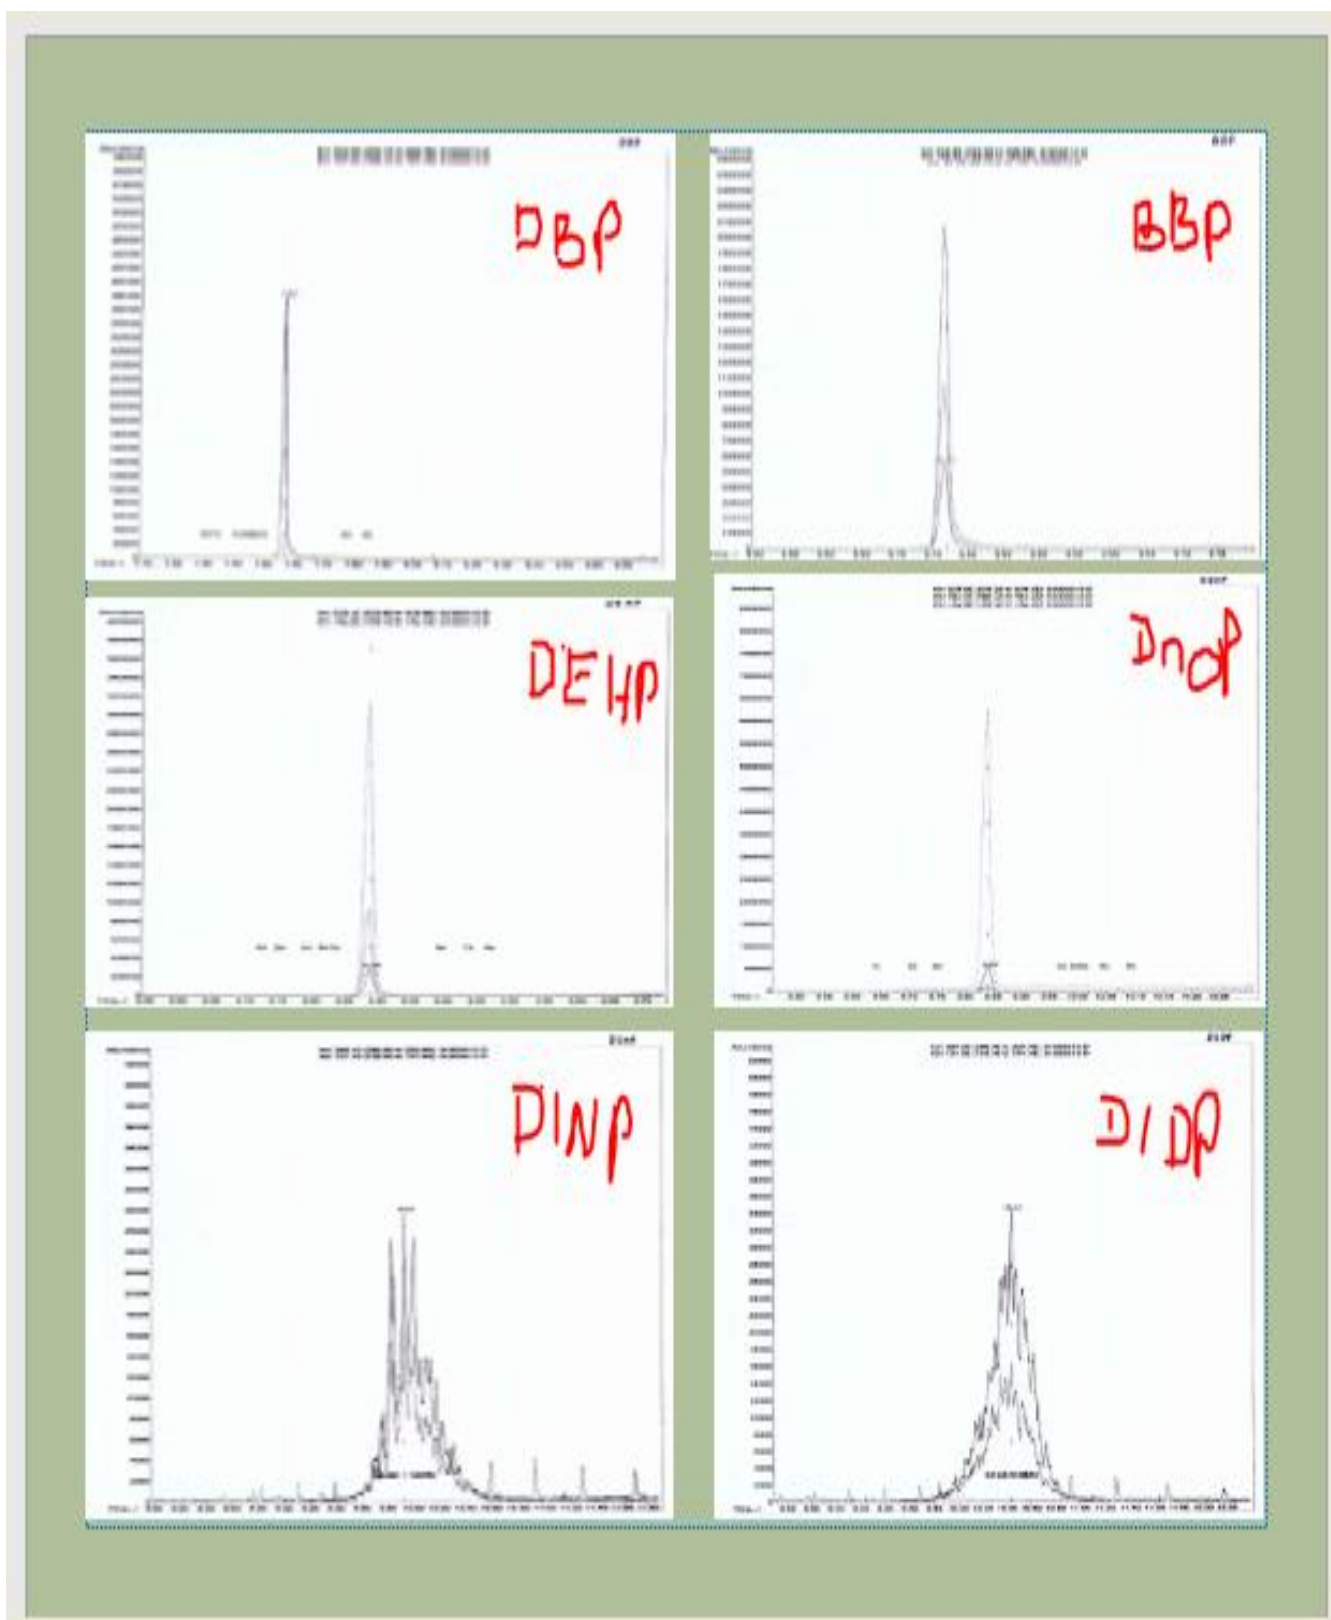

Figure S1. of DBP, BBP, DEHP, DnOP, DiNP and DIDP.

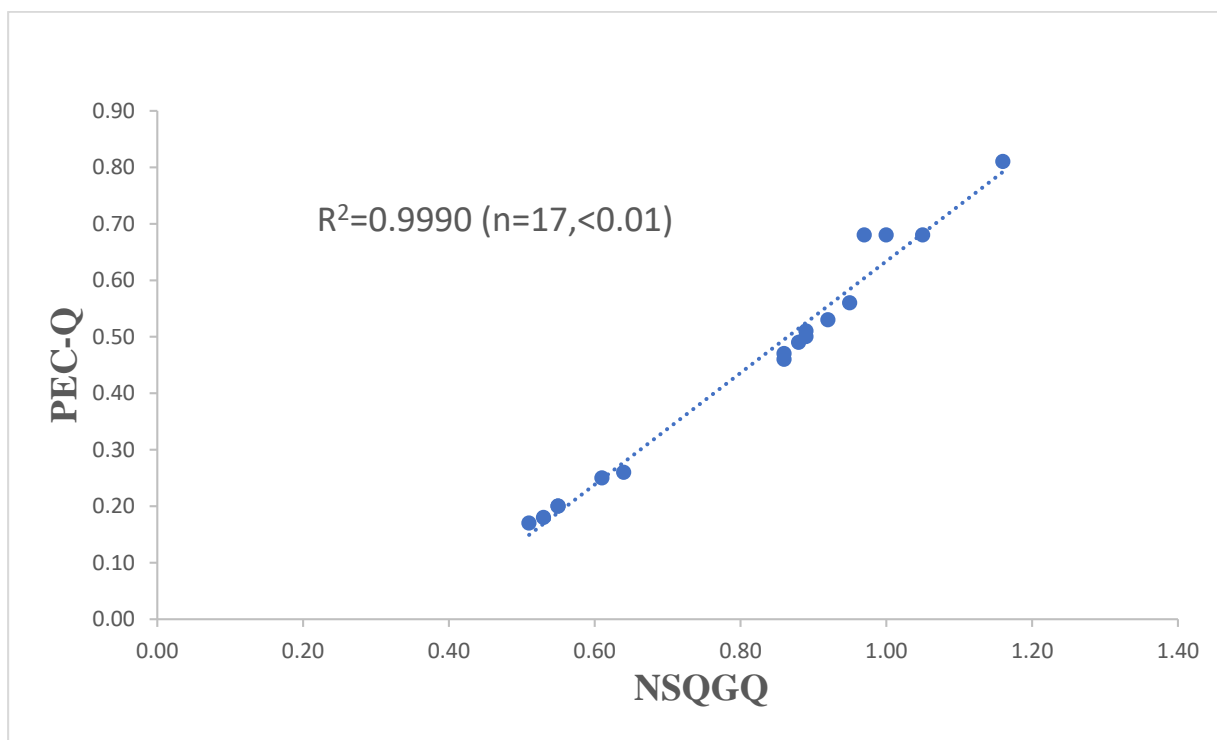

**Figure S1** Linear relationship between the PEC-Q and NSQQQ.
